# Supplementary material for: Mastermind-like 1 (MamL1) and mastermind-like 3 (MamL3) are essential for Notch signaling in vivo
Source: Oxford University Press journal article supplement (doi:10.1242/dev.062802), 2011-11-08
Supplement: dev062802tables1.pdf [file dev062802tables1.pdf]

**Table S1. Primers for quantitative real-time PCR**

| Gene          | Forward (5' to 3')        | Reverse (5' to 3')      |
|---------------|---------------------------|-------------------------|
| <i>Gapdh</i>  | GCACCGTCAAGGCTGAGAAC      | TGGTGAAGACGCCAGTGGA     |
| <i>Map2</i>   | CCACGTACCTGGAGGTGGTAATG   | GTGATCTACCCGGGCCTTTG    |
| <i>Nestin</i> | CTGAGAACTCTCGCTTGACAGACA  | GGAAATGCAGCTTCAGCTTGG   |
| <i>Mash1</i>  | AAGAGCTGCTGGACTTTACCAACTG | ATTTGACGTCGTTGGCGAGA    |
| <i>Math3</i>  | AGATCACAGGAGCTGCCAGAGA    | TCCACCATGTCCTTGGATTCA   |
| <i>Dll1</i>   | GACACCAAGTACCAGTCGGTGTATG | AACCTGGTTCTCAGCAGCAGTC  |
| <i>Hes1</i>   | GCAGACATTCTGGAAATGACTGTGA | GAGTGCGCACCTCGGTGTTA    |
| <i>Hes5</i>   | GAAGGCCGACATCCTGGAGA      | ACCAGGAGTAGCCCTCGCTGTA  |
| <i>Hesr1</i>  | AGCGTTGGCAGCAAGCAAG       | ACGGTGAAATCCGTGAGACTGAG |
| <i>Hesr2</i>  | CAGCAGCAATAAAGCGATTGAGA   | TCACTTGCCAAGCTGCCTTAAAC |
| <i>Hesr3</i>  | TGCTGGCCTTGGAGTGAATG      | CTTGGCTGGCACAGAGTGGA    |
| <i>MamL1</i>  | TCACAAGCAAGATGATGAGCACAG  | GCACGGAAGTCACTCCAGCA    |
| <i>MamL2</i>  | GTGCCTCCCATGAGTGACCT      | AGGGTCTAGGTGTGCTCCTCTG  |
| <i>MamL3</i>  | TTCAACAATGGCGCCAGCTA      | GCTGGGTTGAGGGTTCTCAC    |
