# Supplementary figures and images for: Mastermind-like 1 (MamL1) and mastermind-like 3 (MamL3) are essential for Notch signaling in vivo
Source: Oxford University Press journal article supplement (doi:10.1242/dev.062802), 2011-11-08

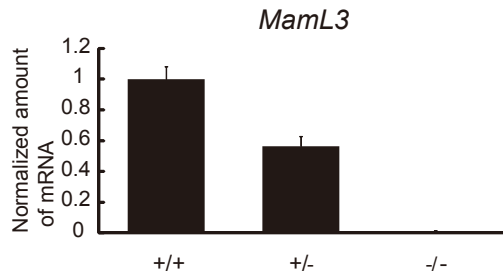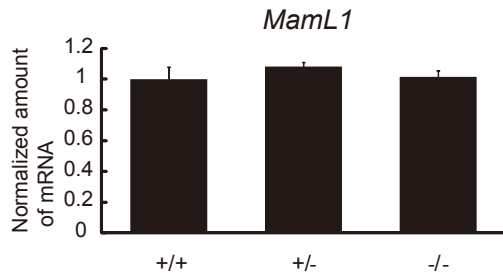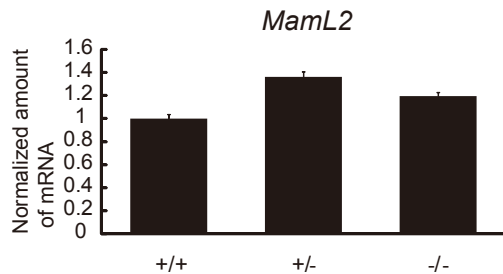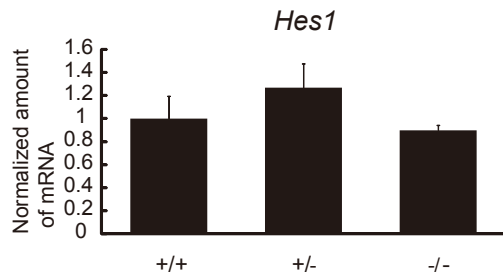

Supplement: dev062802figs1.pdf [file dev062802figs1.pdf]

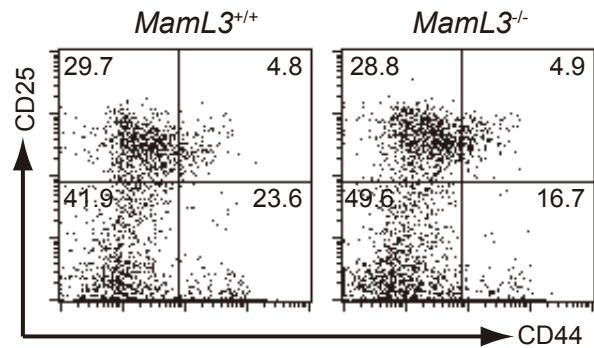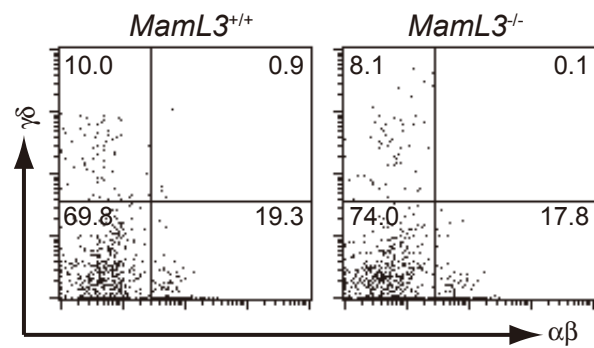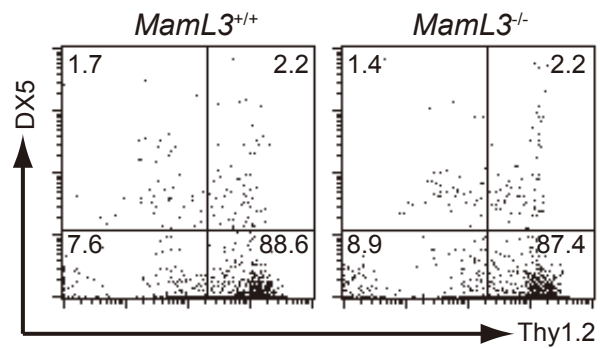

Supplement: dev062802figs2.pdf [file dev062802figs2.pdf]

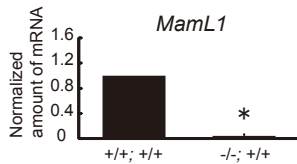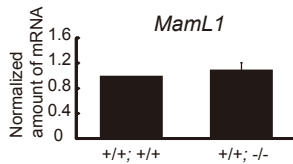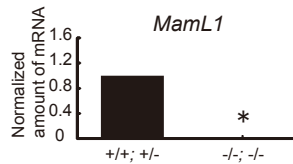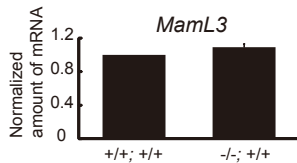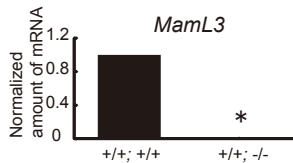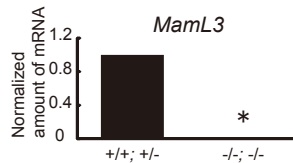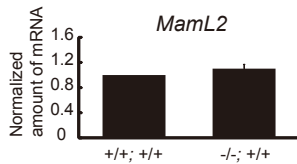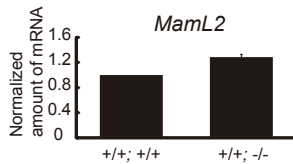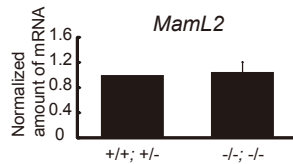

Supplement: dev062802figs3.pdf [file dev062802figs3.pdf]
